# Supplementary material for: Toxicity Impacts on Human Adipose Mesenchymal Stem/Stromal Cells Acutely Exposed to Aroclor and Non-Aroclor Mixtures of Polychlorinated Biphenyl
Source: PubMed Central journal article supplement (PMC9893815; doi:10.1021/acs.est.2c07281), 2023-01-18
Supplement: es2c07281_si_001.pdf [file es2c07281_si_001.pdf]

**Title: Toxicity impacts on human adipose MSCs acutely exposed to Aroclor and non-Aroclor mixtures of PCBs.**

**Authors**

Riley M. Behan-Bush<sup>1</sup>, Jesse N. Liszewski<sup>1</sup>, Michael V. Schrodt, Bhavya Vats, Xueshu Li, Hans-Joachim Lehmler, Aloysius J. Klingelhutz, and James A. Ankrum\*

<sup>1</sup>Contributed equally

\*Corresponding Author: James-ankrum@uiowa.edu

**Supplemental Information**

**Supplementary Figure 1: Adipose MSCs meet the ISCT Minimal Criteria.**

**Supplementary Figure 2: Exposure to PCB mixtures leads to dose dependent changes to MSC morphology.**

**Supplemental Table 1. qRT-PCR Primers**

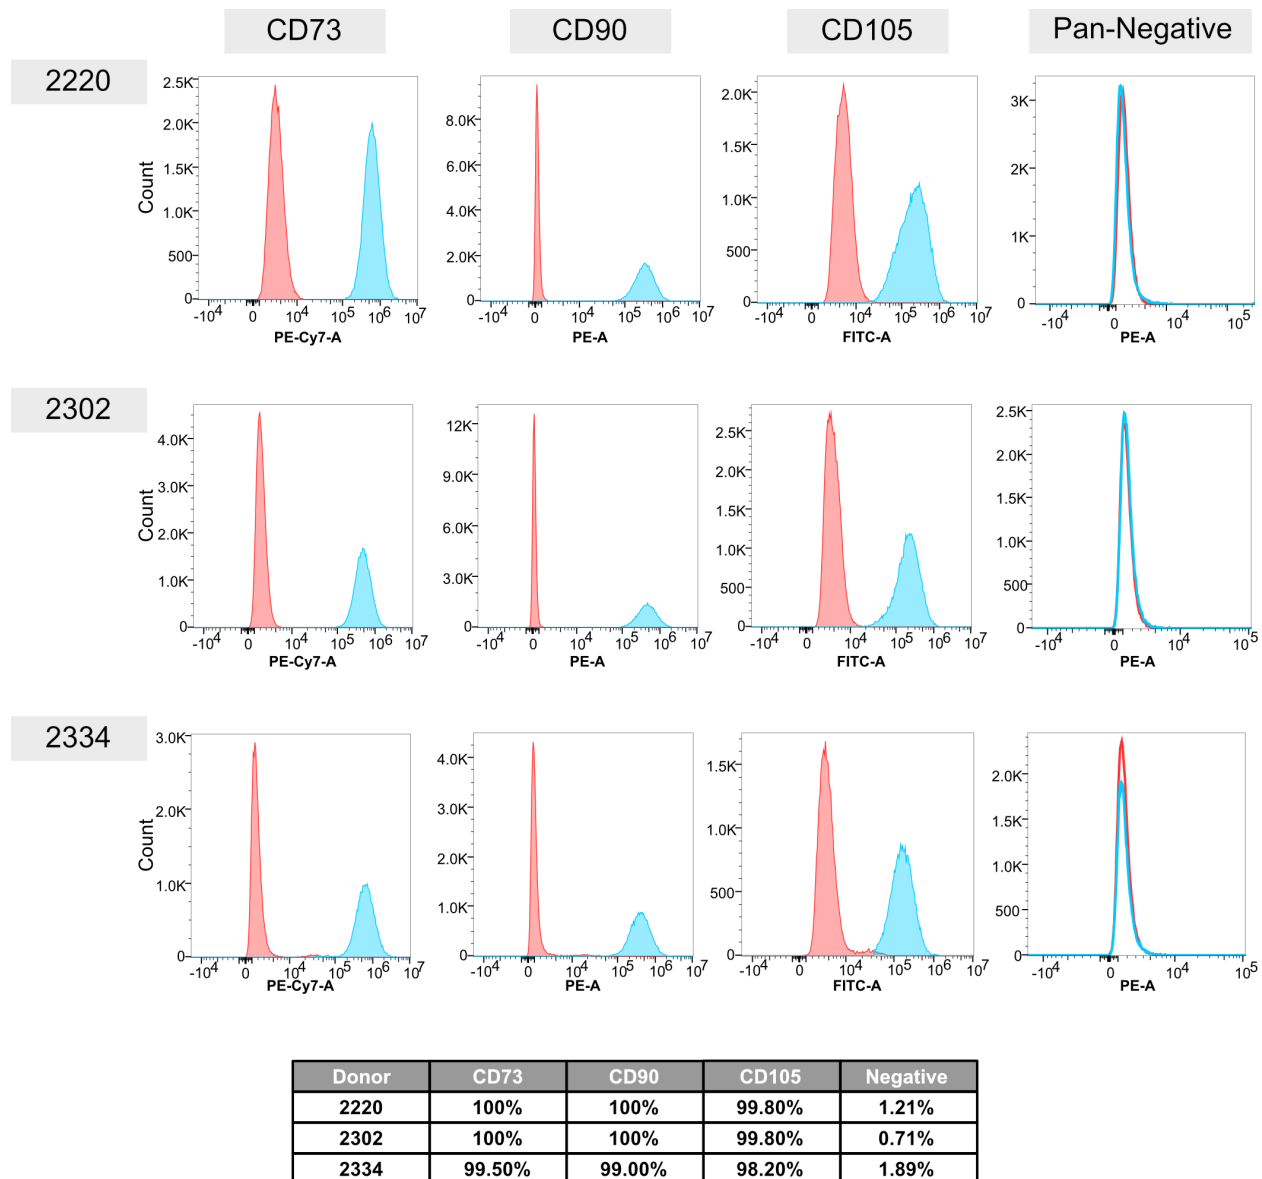

**Supplementary Figure 1: Adipose MSCs meet the ISCT Minimal Criteria.** Adipose MSCs were analyzed for expression of markers according to the ISCT MSC Minimal Criteria. Flow cytometry histogram plots are shown for CD73, CD90, CD105 and a Negative Cocktail (CD34, CD45, CD11b, CD19, and HLA-DR). Each plot contains the isotype control (red peak) and on target sample (blue peak). Table displays the percent of each on-target population considered positive based on gates set using the isotype control.

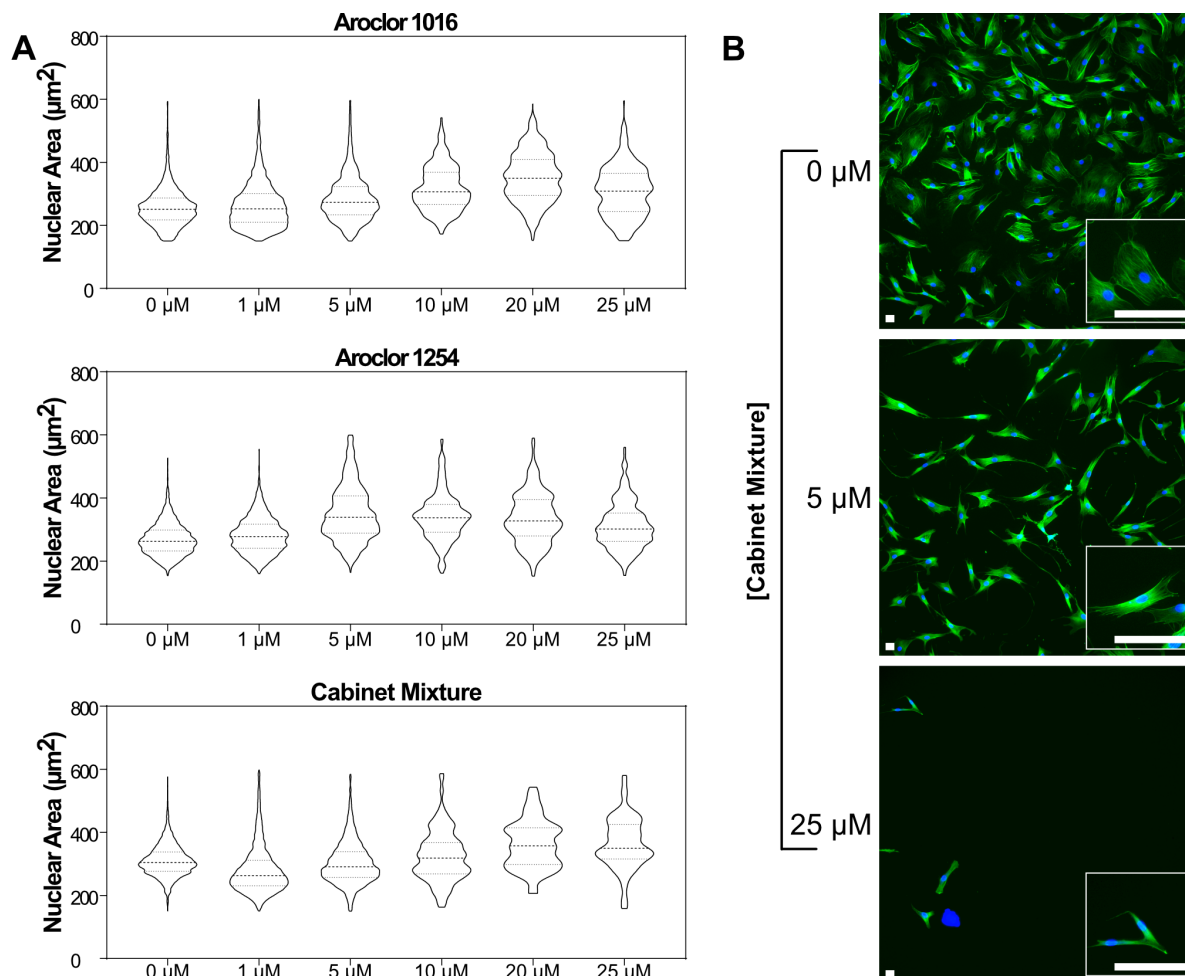

**Supplemental Figure 2: Exposure to PCB mixtures leads to dose dependent changes to MSC morphology.** Morphology of nuclei and cytoskeleton after 48 hours of exposure to PCB mixtures. (A) Violin plot of nuclear area after exposure to 0, 1, 5, 10, 20, or 25  $\mu\text{M}$  concentrations of Aroclor 1016, Aroclor 1254, and Cabinet Mixture. (B) Representative images of cells after exposure to 0, 5, or 25  $\mu\text{M}$  concentrations of Cabinet Mixture. All scale bars represent 50  $\mu\text{m}$ .

**Supplemental Table 1. qRT-PCR Primers**

| Primer Name; Exon Location | IDT Catalog # |
|----------------------------|---------------|
| GAPDH; 3 – 4               | 39a.22214836  |
| ADIPOQ; 1 – 3              | 58.39189358   |
| CCL2; 1 – 2                | 58.45467977   |
| FABP6; 5 – 6               | 58.1261702    |
| PPARG; 7 – 8               | 58.25464465   |
| SCL2A4; 1 – 2              | 58.2557238    |
